# Supplementary material
Source: PubMed Central journal article supplement (PMC6386550)
Supplement: IAI.00776-18-s0001.pdf [file IAI.00776-18-s0001.pdf]

**Table S1. Strains, plasmids and oligonucleotides used in this study**

| Strains                  | Characteristics                                                                                               | Source         |
|--------------------------|---------------------------------------------------------------------------------------------------------------|----------------|
| <i>E. coli</i>           |                                                                                                               |                |
| EC100λpir                | <i>supE44</i> (φ80 <i>lacZΔM15</i> ) <i>hsdR17 recA1 endA1 gyrA96 thi-1 relA1</i> (λpirR6K)                   | Epicenter      |
| SM10λpir                 | <i>thi-1 thr leu tonA lacY supE recA::RP4-2-Tc::Mu Km<sup>r</sup></i> (λpirR6K)                               | Lab collection |
| BTH101                   | F <sup>-</sup> , <i>cya-99, araD139, galE15, galK16, rpsL</i> (Str <sup>r</sup> ), <i>hsdR2, mcrA1, mcrB1</i> |                |
| <i>V. cholerae</i>       |                                                                                                               |                |
| JB58                     | <i>V. cholerae</i> O1 El Tor strain N16961, Sm <sup>R</sup> Δ <i>lacZ</i> ,                                   | Lab collection |
| DT733                    | JB58 Δ <i>toxRS</i>                                                                                           | (1)            |
| XBV222                   | JB58 Δ <i>leuO</i>                                                                                            | (1)            |
| XBV532                   | JB58 Δ <i>ompU</i>                                                                                            | (2)            |
| HR35                     | JB58 Δ <i>tnaA</i>                                                                                            | This study     |
| SS4                      | JB58 <i>toxR</i> <sup>APPD</sup>                                                                              | (3)            |
| <b>Plasmids</b>          |                                                                                                               |                |
| pTL61T                   | <i>lacZ</i> transcriptional reporter, Cb <sup>R</sup>                                                         | (4)            |
| pXB192                   | pTL61T containing <i>toxT</i> promoter                                                                        | (5)            |
| pXB193                   | pTL61T containing <i>ctxAB</i> promoter                                                                       | (6)            |
| pXB194                   | pTL61T containing <i>tcpA</i> promoter                                                                        | (6)            |
| pXB201                   | pTL61T containing <i>toxRS</i> promoter                                                                       | (6)            |
| pXB202                   | pTL61T containing <i>aphA</i> promoter                                                                        | (6)            |
| pXB203                   | pTL61T containing <i>aphB</i> promoter                                                                        | (6)            |
| pXB266                   | pTL61T containing <i>leuO</i> promoter                                                                        | (1)            |
| pXB270                   | pTL61T containing <i>tcpPH</i> promoter                                                                       | (5)            |
| pAL144                   | pTL61T containing <i>ompU</i> promoter                                                                        | (6)            |
| pWM91Δ <i>tnaA</i>       | Allelic exchange vector for in-frame deletion of <i>tnaA</i>                                                  | This study     |
| <b>PCR primers</b>       |                                                                                                               |                |
| <b>Sequence (5'→3'):</b> |                                                                                                               |                |
| VCA0161-F1-SacI          | ATGAGCTCTAGTTCAGCCCGGTGTGCCCATC                                                                               |                |
| VCA0161-F2               | TTTCGTATTCGTCCCGTGCTACGCCACTTTACGGCTCGC                                                                       |                |
| VCA0161-R1 BamHI         | AAAGGATCCCAAATAGTGGCGGCTGCGCCTG                                                                               |                |
| VCA0161-R2               | CGTAGCACGGGACGAATACGAAAAGGTTCTGGTAAGTG                                                                        |                |
| VCA0161-F-SacI           | GGGAGCTCTAGGAATACCCAGCATGGAAAATTTTAAACAC                                                                      |                |
| VCA0161-R-SphI           | GGGCATGCTGCACTTTTTCAATACCGTATTAGG                                                                             |                |

**References.**

1. Bina XR, Taylor DL, Vikram A, Ante VM, Bina JE. 2013. *Vibrio cholerae* ToxR downregulates virulence factor production in response to cyclo(Phe-Pro). *MBio* 4:e00366-13.
2. Bina XR, Howard MF, Ante VM, Bina JE. 2016. *Vibrio cholerae* LeuO Links the ToxR Regulon to Expression of Lipid A Remodeling Genes. *Infect Immun* 84:3161-3171.
3. Ante VM, Bina XR, Howard MF, Sayeed S, Taylor DL, Bina JE. 2015. *Vibrio cholerae* leuO Transcription Is Positively Regulated by ToxR and Contributes to Bile Resistance. *J Bacteriol* 197:3499-510.
4. Linn T, St Pierre R. 1990. Improved vector system for constructing transcriptional fusions that ensures independent translation of *lacZ*. *J Bacteriol* 172:1077-84.
5. Bina XR, Provenzano D, Nguyen N, Bina JE. 2008. *Vibrio cholerae* RND family efflux systems are required for antimicrobial resistance, optimal virulence factor production, and colonization of the infant mouse small intestine. *Infect Immun* 76:3595-605.
6. Bina XR, Bina JE. 2010. The cyclic dipeptide cyclo(Phe-Pro) inhibits cholera toxin and toxin-coregulated pilus production in O1 El Tor *Vibrio cholerae*. *J Bacteriol* 192:3829-32.
