# Supplementary material
Source: PubMed Central journal article supplement (PMC6386550)
Supplement: IAI.00776-18-s0002.pdf [file IAI.00776-18-s0002.pdf]

**TABLE S2. RNA sequencing results for *V. cholerae* grown in the presence of indole.**

| Number | Locus number | Gene ID | Log2 fold change<br>(0.5mM indole/0mM indole) | P-value  | FDR P-value | Gene   |
|--------|--------------|---------|-----------------------------------------------|----------|-------------|--------|
| 1      | VC0018       | 2614875 | -1.25881                                      | 1.28E-10 | 2.33E-08    | ibpA   |
| 2      | VC0143       | 2615264 | -0.69368                                      | 6.18E-05 | 1.65E-03    | ....   |
| 3      | VC0164       | 2612953 | -0.7571                                       | 1.27E-05 | 4.38E-04    | vexB   |
| 4      | VC0165       | 2612954 | -0.77811                                      | 7.71E-06 | 2.91E-04    | vexA   |
| 5      | VC0166       | 2614082 | -1.448                                        | 0        | 0           | vexR   |
| 6      | VC0188       | 2614711 | -0.57801                                      | 6.00E-04 | 0.011427    | prlC   |
| 7      | VC0280       | 2615003 | 0.72149                                       | 1.26E-03 | 0.021222    | cadB   |
| 8      | VC0486       | 2615280 | 0.577671                                      | 8.70E-09 | 7.30E-07    | ....   |
| 9      | VC0513       | 2615805 | -0.75862                                      | 2.20E-05 | 6.98E-04    | ....   |
| 10     | VC0515       | 2615807 | -0.66973                                      | 4.28E-08 | 2.94E-06    | ....   |
| 11     | VC0574       | 2615251 | 0.595842                                      | 3.31E-09 | 3.30E-07    | petB   |
| 12     | VC0589       | 2615377 | -0.69519                                      | 5.54E-04 | 0.01088     | ....   |
| 13     | VC0590       | 2615378 | -0.70909                                      | 4.65E-04 | 9.33E-03    | ....   |
| 14     | VC0784       | 2615327 | 0.582814                                      | 6.35E-08 | 4.05E-06    | ....   |
| 15     | VC0818       | 2614485 | -0.92453                                      | 4.77E-07 | 2.52E-05    | ....   |
| 16     | VC0819       | 2614486 | -1.37999                                      | 1.72E-13 | 7.96E-11    | aldA-1 |
| 17     | VC0820       | 2614487 | -1.20419                                      | 4.86E-10 | 6.19E-08    | tagA   |
| 18     | VC0821       | 2614488 | -1.21528                                      | 4.56E-10 | 6.19E-08    | ....   |
| 19     | VC0823       | 2614490 | -0.80036                                      | 3.53E-08 | 2.51E-06    | mop    |
| 20     | VC0824       | 2614491 | -0.98214                                      | 4.54E-08 | 2.94E-06    | tagD   |
| 21     | VC0825       | 2614492 | -0.74122                                      | 1.50E-06 | 6.99E-05    | tcpI   |
| 22     | VC0828       | 2614495 | -0.65985                                      | 1.77E-06 | 8.09E-05    | tcpA   |
| 23     | VC0829       | 2614496 | -0.74848                                      | 1.26E-06 | 6.06E-05    | tcpB   |
| 24     | VC0830       | 2614497 | -0.73982                                      | 2.34E-05 | 7.27E-04    | tcpQ   |
| 25     | VC0831       | 2614498 | -0.84438                                      | 5.50E-09 | 5.02E-07    | tcpC   |
| 26     | VC0832       | 2614499 | -1.06118                                      | 4.55E-09 | 4.43E-07    | tcpR   |
| 27     | VC0833       | 2614500 | -1.1206                                       | 1.14E-12 | 3.81E-10    | tcpD   |
| 28     | VC0834       | 2614501 | -1.04103                                      | 1.31E-08 | 1.01E-06    | tcpS   |
| 29     | VC0835       | 2614502 | -1.01403                                      | 7.59E-10 | 9.04E-08    | tcpT   |
| 30     | VC0836       | 2614503 | -1.03839                                      | 1.41E-07 | 8.41E-06    | tcpE   |
| 31     | VC0837       | 2614504 | -1.13419                                      | 2.03E-11 | 4.41E-09    | tcpF   |
| 32     | VC0838       | 2614505 | -0.66928                                      | 5.44E-06 | 2.19E-04    | toxT   |
| 33     | VC0842       | 2614509 | -0.57967                                      | 1.70E-04 | 3.96E-03    | ....   |
| 34     | VC0844       | 2614511 | -0.71133                                      | 5.22E-05 | 1.47E-03    | acfA   |
| 35     | VC0845       | 2614512 | -0.6745                                       | 2.74E-05 | 8.36E-04    | acfD   |
| 36     | VC0846       | 2614513 | -0.58867                                      | 2.25E-03 | 0.032029    | ....   |
| 37     | VC0856       | 2614523 | -0.77836                                      | 9.40E-06 | 3.42E-04    | dnaJ   |
| 38     | VC0880       | 2614547 | 0.822142                                      | 3.45E-07 | 1.91E-05    | ....   |
| 39     | VC0884       | 2614113 | -0.65217                                      | 1.58E-05 | 5.20E-04    | ....   |
| 40     | VC0885       | 2614114 | -0.7041                                       | 6.63E-05 | 1.75E-03    | ....   |
| 41     | VC0886       | 2614115 | -0.66364                                      | 5.28E-05 | 1.48E-03    | ....   |
| 42     | VC0916       | 2614136 | 2.315326                                      | 2.71E-04 | 5.76E-03    | vpsU   |
| 43     | VC0917       | 2614137 | 2.058211                                      | 2.21E-05 | 6.98E-04    | vpsA   |
| 44     | VC0918       | 2614138 | 1.527912                                      | 2.65E-04 | 5.75E-03    | vpsB   |
| 45     | VC0930       | 2614150 | 1.313227                                      | 5.81E-04 | 0.011238    | rbmC   |
| 46     | VC0932       | 2614152 | 2.432418                                      | 1.53E-05 | 5.08E-04    | rbmE   |
| 47     | VC0934       | 2614154 | 2.96624                                       | 8.34E-07 | 4.12E-05    | vpsL   |
| 48     | VC0935       | 2614155 | 2.108297                                      | 1.87E-05 | 6.06E-04    | vpsM   |

|    |        |         |          |          |          |      |
|----|--------|---------|----------|----------|----------|------|
| 49 | VC0936 | 2614156 | 1.666023 | 8.72E-04 | 0.015634 | vpsN |
| 50 | VC0937 | 2614157 | 1.010451 | 1.81E-03 | 0.027471 | vpsO |
| 51 | VC1046 | 2614316 | 0.601258 | 7.84E-05 | 2.05E-03 | fadI |
| 52 | VC1093 | 2614363 | -0.67837 | 1.73E-06 | 7.97E-05 | oppC |
| 53 | VC1172 | 2614605 | 0.61079  | 2.68E-04 | 5.75E-03 | trpD |
| 54 | VC1173 | 2614606 | 0.857778 | 2.70E-04 | 5.76E-03 | trpG |
| 55 | VC1174 | 2614607 | 1.109521 | 2.20E-10 | 3.69E-08 | trpE |
| 56 | VC1183 | 2614616 | 0.616977 | 7.28E-06 | 2.77E-04 | .... |
| 57 | VC1217 | 2614654 | -0.61884 | 7.25E-04 | 0.013258 | .... |
| 58 | VC1316 | 2614770 | -1.14891 | 0        | 0        | .... |
| 59 | VC1317 | 2614771 | -1.13309 | 1.22E-14 | 6.44E-12 | .... |
| 60 | VC1318 | 2614772 | -0.87578 | 5.34E-09 | 5.02E-07 | ompV |
| 61 | VC1319 | 2614773 | -1.06683 | 9.62E-12 | 2.22E-09 | carS |
| 62 | VC1320 | 2614774 | -1.00602 | 4.13E-10 | 5.87E-08 | carR |
| 63 | VC1325 | 2614779 | 0.608037 | 6.32E-06 | 2.51E-04 | mglB |
| 64 | VC1409 | 2614041 | -1.25889 | 0        | 0        | vceC |
| 65 | VC1410 | 2614042 | -1.12355 | 9.99E-16 | 9.23E-13 | vceA |
| 66 | VC1411 | 2614043 | -0.97588 | 1.13E-14 | 6.44E-12 | vceB |
| 67 | VC1442 | 2614074 | 0.67803  | 2.16E-11 | 4.44E-09 | ccoN |
| 68 | VC1448 | 2614080 | -0.60189 | 1.03E-05 | 3.64E-04 | rtxB |
| 69 | VC1449 | 2614081 | -0.77061 | 4.49E-08 | 2.94E-06 | .... |
| 70 | VC1450 | 2613956 | -0.65722 | 2.50E-06 | 1.11E-04 | rtxC |
| 71 | VC1456 | 2613962 | -0.75861 | 9.44E-06 | 3.42E-04 | ctxB |
| 72 | VC1457 | 2613963 | -0.59964 | 1.24E-05 | 4.33E-04 | ctxA |
| 73 | VC1492 | 2613998 | 0.761978 | 6.66E-10 | 8.20E-08 | .... |
| 74 | VC1510 | 2614016 | 1.116413 | 3.56E-10 | 5.25E-08 | .... |
| 75 | VC1511 | 2614017 | 1.026774 | 1.89E-07 | 1.11E-05 | fdnI |
| 76 | VC1512 | 2614018 | 1.058322 | 2.30E-09 | 2.36E-07 | fdhB |
| 77 | VC1513 | 2613892 | 1.0086   | 7.30E-08 | 4.57E-06 | .... |
| 78 | VC1514 | 2613893 | 0.973247 | 8.34E-10 | 9.62E-08 | .... |
| 79 | VC1515 | 2613894 | 0.718859 | 7.50E-07 | 3.79E-05 | .... |
| 80 | VC1516 | 2613895 | 0.633804 | 2.72E-10 | 4.36E-08 | .... |
| 81 | VC1517 | 2613896 | 0.708429 | 3.28E-12 | 1.01E-09 | .... |
| 82 | VC1518 | 2613897 | 0.784926 | 1.07E-08 | 8.55E-07 | .... |
| 83 | VC1523 | 2613902 | 0.739097 | 2.18E-13 | 8.04E-11 | .... |
| 84 | VC1524 | 2613903 | 0.718371 | 4.21E-12 | 1.15E-09 | .... |
| 85 | VC1576 | 2613955 | -0.90315 | 2.16E-09 | 2.28E-07 | .... |
| 86 | VC1577 | 2613831 | -0.88935 | 4.42E-08 | 2.94E-06 | almG |
| 87 | VC1578 | 2613832 | -1.05571 | 1.97E-13 | 8.04E-11 | almF |
| 88 | VC1579 | 2613833 | -0.94349 | 4.47E-08 | 2.94E-06 | almE |
| 89 | VC1584 | 2613838 | -0.69782 | 3.13E-04 | 6.56E-03 | ankB |
| 90 | VC1741 | 2613746 | 0.640273 | 1.25E-04 | 3.09E-03 | .... |
| 91 | VC1807 | 2613687 | -1.05129 | 1.77E-05 | 5.78E-04 | .... |
| 92 | VC1825 | 2613579 | -0.88546 | 3.42E-05 | 1.03E-03 | marA |
| 93 | VC1888 | 2613517 | 1.019879 | 1.94E-03 | 0.028956 | bap1 |
| 94 | VC2078 | 2613334 | -0.59922 | 2.31E-04 | 5.08E-03 | feoA |
| 95 | VC2089 | 2613345 | 0.809977 | 1.67E-15 | 1.23E-12 | sdhA |
| 96 | VC2090 | 2613346 | 0.816658 | 1.21E-07 | 7.30E-06 | sdhD |
| 97 | VC2091 | 2613347 | 0.748507 | 3.26E-08 | 2.36E-06 | sdhC |
| 98 | VC2221 | 2613261 | 0.870114 | 1.56E-04 | 3.69E-03 | .... |
| 99 | VC2283 | 2613205 | 1.0376   | 4.67E-12 | 1.15E-09 | .... |

|     |         |         |          |          |          |         |
|-----|---------|---------|----------|----------|----------|---------|
| 100 | VC2305  | 2613101 | 0.858466 | 6.95E-06 | 2.70E-04 | ompK    |
| 101 | VC2352  | 2613148 | 0.817865 | 5.46E-07 | 2.80E-05 | NupC-f  |
| 102 | VC2392  | 2613061 | -0.59057 | 4.11E-06 | 1.71E-04 | mutT    |
| 103 | VC2485  | 2615142 | 0.587067 | 6.70E-09 | 5.75E-07 | leuO    |
| 104 | VC2544  | 2615561 | 0.607502 | 1.98E-09 | 2.15E-07 | fbp     |
| 105 | VC2674  | 2615502 | -0.65356 | 1.75E-04 | 3.98E-03 | hslU    |
| 106 | VCA0025 | 2612526 | 0.871835 | 1.32E-10 | 2.33E-08 | ....    |
| 107 | VCA0029 | 2612470 | -0.69412 | 4.90E-04 | 9.78E-03 | oscR    |
| 108 | VCA0052 | 2612167 | 0.665344 | 5.01E-06 | 2.03E-04 | ....    |
| 109 | VCA0053 | 2612153 | 0.715214 | 5.56E-05 | 1.51E-03 | deoD-2  |
| 110 | VCA0136 | 2612747 | 0.692371 | 6.86E-06 | 2.70E-04 | glpQ    |
| 111 | VCA0137 | 2612732 | 0.769744 | 3.25E-10 | 5.00E-08 | glpT    |
| 112 | VCA0161 | 2612777 | 0.775051 | 1.00E-05 | 3.57E-04 | tnaA    |
| 113 | VCA0244 | 2612209 | 0.650181 | 2.95E-03 | 0.039936 | araD    |
| 114 | VCA0246 | 2612421 | 0.585303 | 6.85E-04 | 0.012648 | ulaA    |
| 115 | VCA0276 | 2612035 | 0.704095 | 4.51E-12 | 1.15E-09 | ....    |
| 116 | VCA0278 | 2612058 | 0.608111 | 1.41E-05 | 4.74E-04 | glyA-2  |
| 117 | VCA0280 | 2612010 | 0.709558 | 3.40E-06 | 1.48E-04 | ....    |
| 118 | VCA0363 | 2612729 | -0.76565 | 7.66E-08 | 4.71E-06 | ....    |
| 119 | VCA0447 | 2611936 | -0.69493 | 1.22E-04 | 3.04E-03 | ....    |
| 120 | VCA0451 | 2611922 | -0.60697 | 1.12E-03 | 0.01924  | ....    |
| 121 | VCA0453 | 2611920 | -0.64392 | 2.20E-03 | 0.031596 | ....    |
| 122 | VCA0495 | 2612922 | -0.63036 | 4.79E-10 | 6.19E-08 | ....    |
| 123 | VCA0556 | 2612312 | 0.629457 | 1.13E-09 | 1.26E-07 | ....    |
| 124 | VCA0657 | 2612772 | 0.645192 | 1.90E-04 | 4.26E-03 | glpD    |
| 125 | VCA0658 | 2612769 | 0.601229 | 1.06E-04 | 2.67E-03 | ....    |
| 126 | VCA0732 | 2611948 | -0.83917 | 2.32E-05 | 7.26E-04 | ....    |
| 127 | VCA0744 | 2611914 | 0.887196 | 1.32E-08 | 1.01E-06 | glpK    |
| 128 | VCA0745 | 2611909 | 0.938236 | 1.34E-08 | 1.01E-06 | glpF    |
| 129 | VCA0747 | 2611906 | 0.80673  | 6.50E-04 | 0.012065 | glpA    |
| 130 | VCA0758 | 2611835 | 0.578872 | 2.30E-04 | 5.08E-03 | artQ    |
| 131 | VCA0759 | 2611826 | 0.575315 | 1.14E-03 | 0.01949  | artI    |
| 132 | VCA0811 | 2611865 | 0.799123 | 8.91E-09 | 7.31E-07 | gbpA    |
| 133 | VCA0819 | 2612375 | -0.96205 | 1.58E-03 | 0.024753 | groES-2 |
| 134 | VCA0843 | 2612256 | 0.915307 | 6.96E-11 | 1.35E-08 | gapA-2  |
| 135 | VCA0849 | 2612210 | 0.724404 | 7.34E-04 | 0.013345 | ....    |
| 136 | VCA0864 | 2612924 | 0.615492 | 1.86E-03 | 0.028078 | ....    |
| 137 | VCA0867 | 2612873 | 0.918618 | 5.81E-09 | 5.11E-07 | ompW    |
| 138 | VCA0983 | 2612816 | 0.669776 | 1.89E-04 | 4.25E-03 | ....    |
| 139 | VCA0984 | 2612817 | 0.914808 | 2.70E-03 | 0.037254 | lldD    |
| 140 | VCA0998 | 2612248 | -0.72791 | 3.04E-08 | 2.24E-06 | ....    |
| 141 | VCA1042 | 2612135 | -0.58683 | 5.57E-09 | 5.02E-07 | ....    |
| 142 | VCA1043 | 2612128 | -0.62412 | 4.44E-05 | 1.28E-03 | tagE-2  |
| 143 | VCA1060 | 2612048 | -0.64697 | 8.46E-06 | 3.12E-04 | ribB    |
